# Supplementary material
Source: PubMed Central journal article supplement (PMC2822044)
Supplement: NIHMS138329-supplement-01.pdf [file NIHMS138329-supplement-01.pdf]

Supplemental Table 1. Genotyping for IDDM. Multiple genes control the development of insulinitis and diabetes frequency and severity in NOD mice (a-f). Markers used to capture NOD *Idd* alleles are given and PCR primer sequences used were obtained from two public web sites (<http://www.informatics.jax.org> and <http://www-genome.wi.mit.edu>). For the NOD.*Ctsb*<sup>-/-</sup> strain, NOD alleles at all sites were captured except for markers on Chr. 14 which include *Idd12* (D14Mit60) and passenger loci near *Ctsb* (D14Mit30 and D14Mit37) which may still be segregating. For the NOD.*Ctss*<sup>-/-</sup> strain, we have captured NOD alleles at all sites except for markers on Chr. 3 which include *Idd10* and the *Ctss* gene.

| Gene Name    | Marker    | Chromosome |
|--------------|-----------|------------|
| <i>Idd1</i>  | D17Nds2   | 17         |
| <i>Idd2</i>  | D9Mit191  | 9          |
| <i>Idd3</i>  | D3Mit22   | 3          |
| <i>Idd4</i>  | D11mit325 | 11         |
| <i>Idd5</i>  | D1Mcg6    | 1          |
| <i>Idd6</i>  | D6Mit14   | 6          |
| <i>Idd7</i>  | D7Mit76   | 7          |
| <i>Idd8</i>  | D14Nds1   | 14         |
| <i>Idd9</i>  | D4 Mit234 | 4          |
| <i>Idd10</i> | D3Mit100  | 3          |
| <i>Idd11</i> | D4Mit234  | 4          |

|                           |           |    |
|---------------------------|-----------|----|
| <i>Idd12</i>              | D14Mit60  | 14 |
| <i>Idd13</i>              | D2Mit493  | 2  |
| <i>Idd15</i>              | D5Mit61   | 14 |
| <i>Idd16</i>              | D17Nds2   | 5  |
| <i>Idd17</i>              | D3Mit175  | 17 |
| <i>Idd18</i>              | D3Mit10   | 3  |
| <i>Idd19</i>              | D6Mit14   | 3  |
| <i>Ctsb</i> (Cathepsin B) | D14Mit30  | 14 |
| <i>Ctsb</i> (Cathepsin B) | D14Mit37  | 14 |
| <i>Ctss</i> (Cathepsin S) | D3Mit100  | 3  |
| <i>Ctsl</i> (Cathepsin L) | D13Mit314 | 13 |

References for this table:

a. Prochazka M., Leiter E.H., Serreze D.V, Coleman D.L.. 1987. Three recessive loci required for insulin-dependent diabetes in nonobese diabetic mice. *Science* 237:286-289

b. Griffiths M.M., Encinas J.A., Remmers E.F., Kuchroo V.K., Wilder R.L. 1999. Mapping autoimmunity genes. *Current Opinions in Immunology* 11:689-700

- c. Lyons P.A., Hancock W.W., Denny P., Lord C.J., Hill N.J., Armitage N., Siegmund T., Todd J.A., Phillips M.S., Hess J.F., Chen S.L., Fischer P.A., Peterson L.B., Wicker L.S. 2000. The NOD Idd9 genetic interval influences the pathogenicity of insulinitis and contains molecular variants of Cd30, Tnfr2, and Cd137. *Immunity* 13:107-115
- d. Wicker L.S., Todd J.A., Prins J.B., Podolin P.L., Renjilian R.J., Peterson L.B. 1994. Resistance alleles at two non-major histocompatibility complex-linked insulin-dependent diabetes loci on chromosome 3, Idd3 and Idd10, protect nonobese diabetic mice from diabetes. *Journal of Experimental Medicine* 180:1705-1713
- e. Lamhamedi-Cherradi S.-E., Boulard O., Gonzalez C., Kassis N., Damotte D., Eloy L., Fluteau G., Levi-Strauss M., Garchon H.-J. 2001. Further mapping of the Idd5.1 locus for autoimmune diabetes in NOD mice. *Diabetes* 50:2874-2878
- f. Grattan M., Mi Q.-S., Meagher C., Delovitch T.I. 2002. Congenic mapping of the diabetogenic locus *Idd4* to a 5.2-cM region of chromosome 11 in NOD mice. *Diabetes* 51:215-223
